# Supplementary material
Source: Springer Nature journal article supplement (https://www.springermedizin.de/resource/supplementary/12879_2007_753_MOESM1_ESM.pdf/9449306)

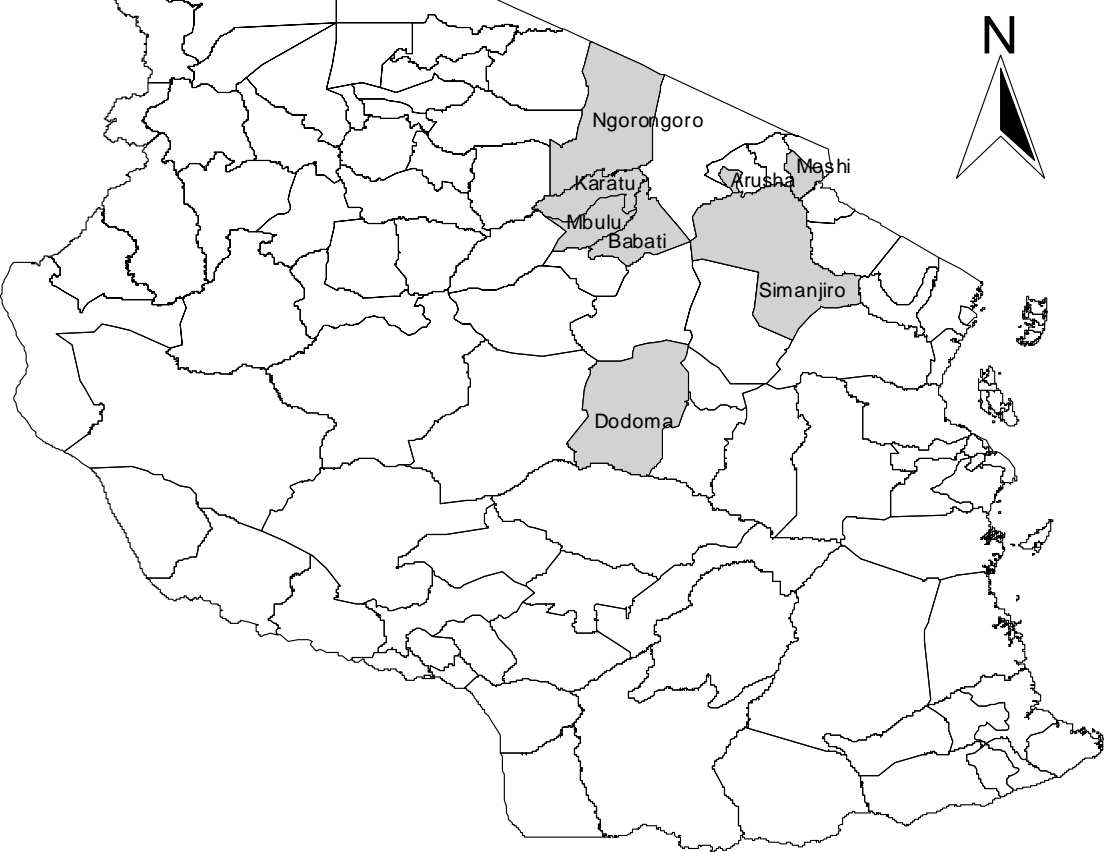

100 0 100 200 Kilometers

Supplement: MOESM1 [file 9449306]
